# Supplementary material
Source: MDPI journal article supplement (https://www.mdpi.com/2673-9623/3/2/19)
Supplement: s1 [file s1]

**Vapor composition and vaporization thermodynamics of  
1-ethyl-3-methylimidazolium hexafluorophosphate ionic liquid**

A.M. Dunaev, V.B. Motalov, M.A. Korobov, D.N. Govorov, V.V. Aleksandriiskii,  
L.S. Kudin

Corresponding author: amdunaev@ro.ru

**Supplementary materials**

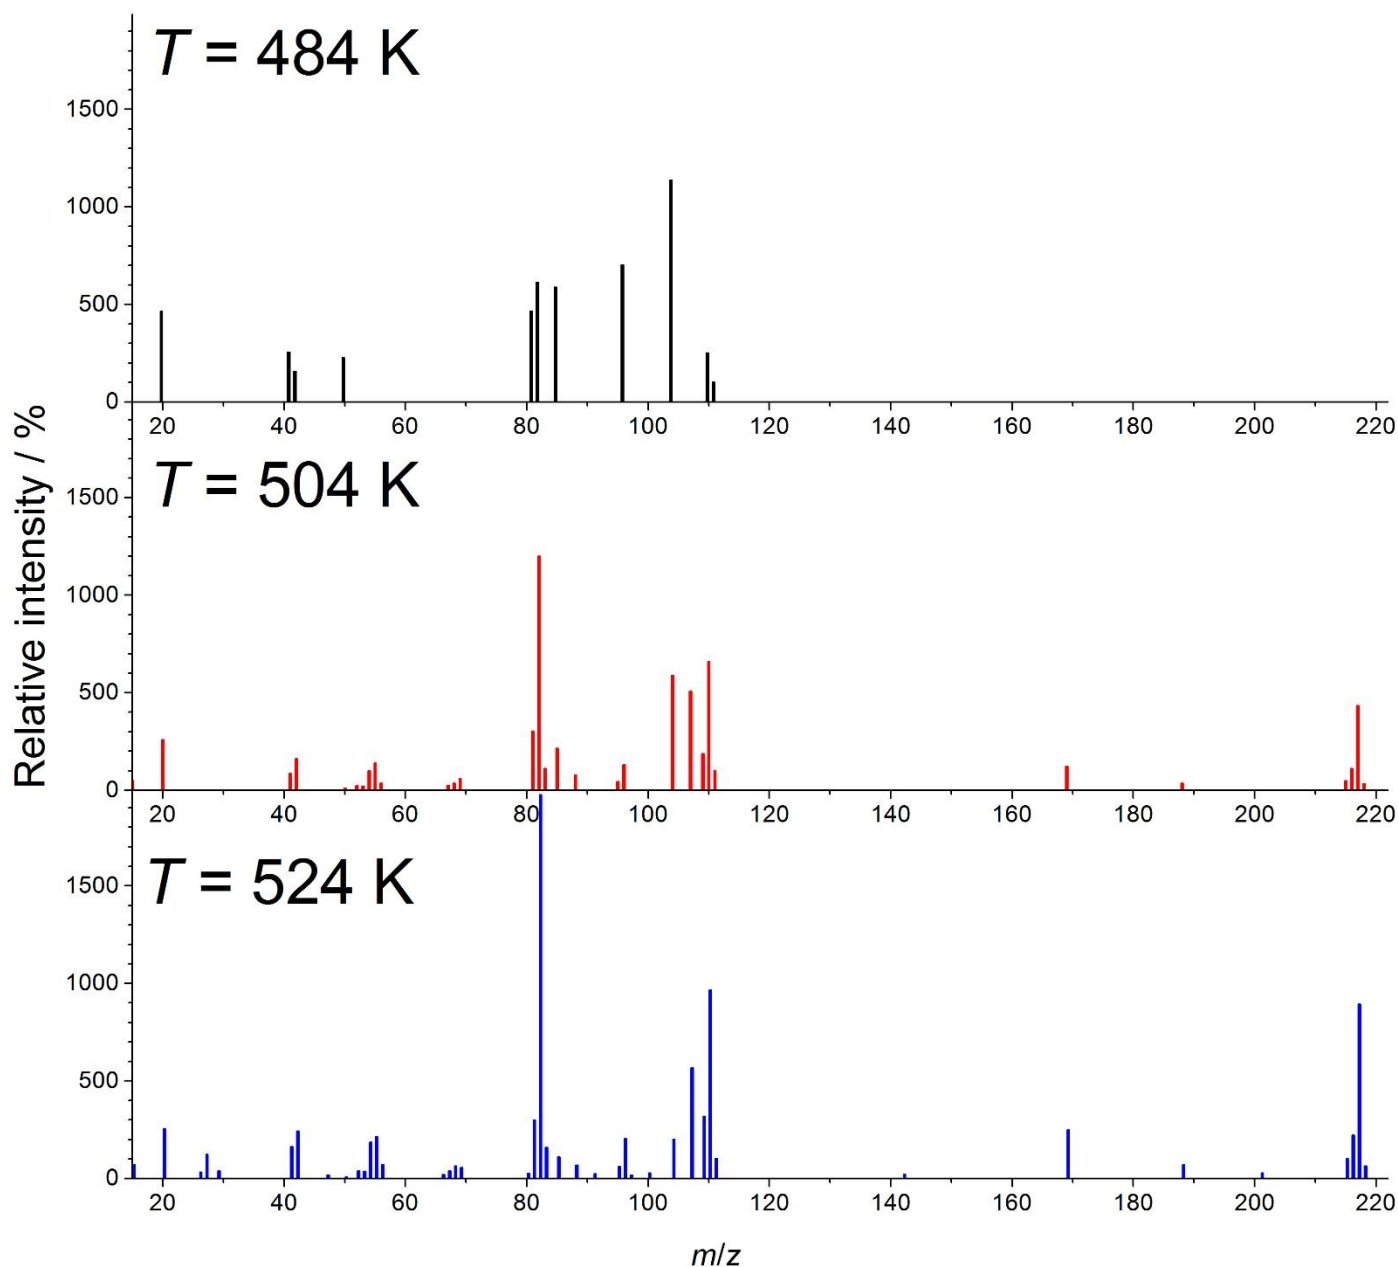

Figure S1. Full-scale background subtracted electron ionization mass spectra of EMImPF<sub>6</sub> under EC-I conditions relative to the intensity of the parent cation ( $m/z = 111$ )

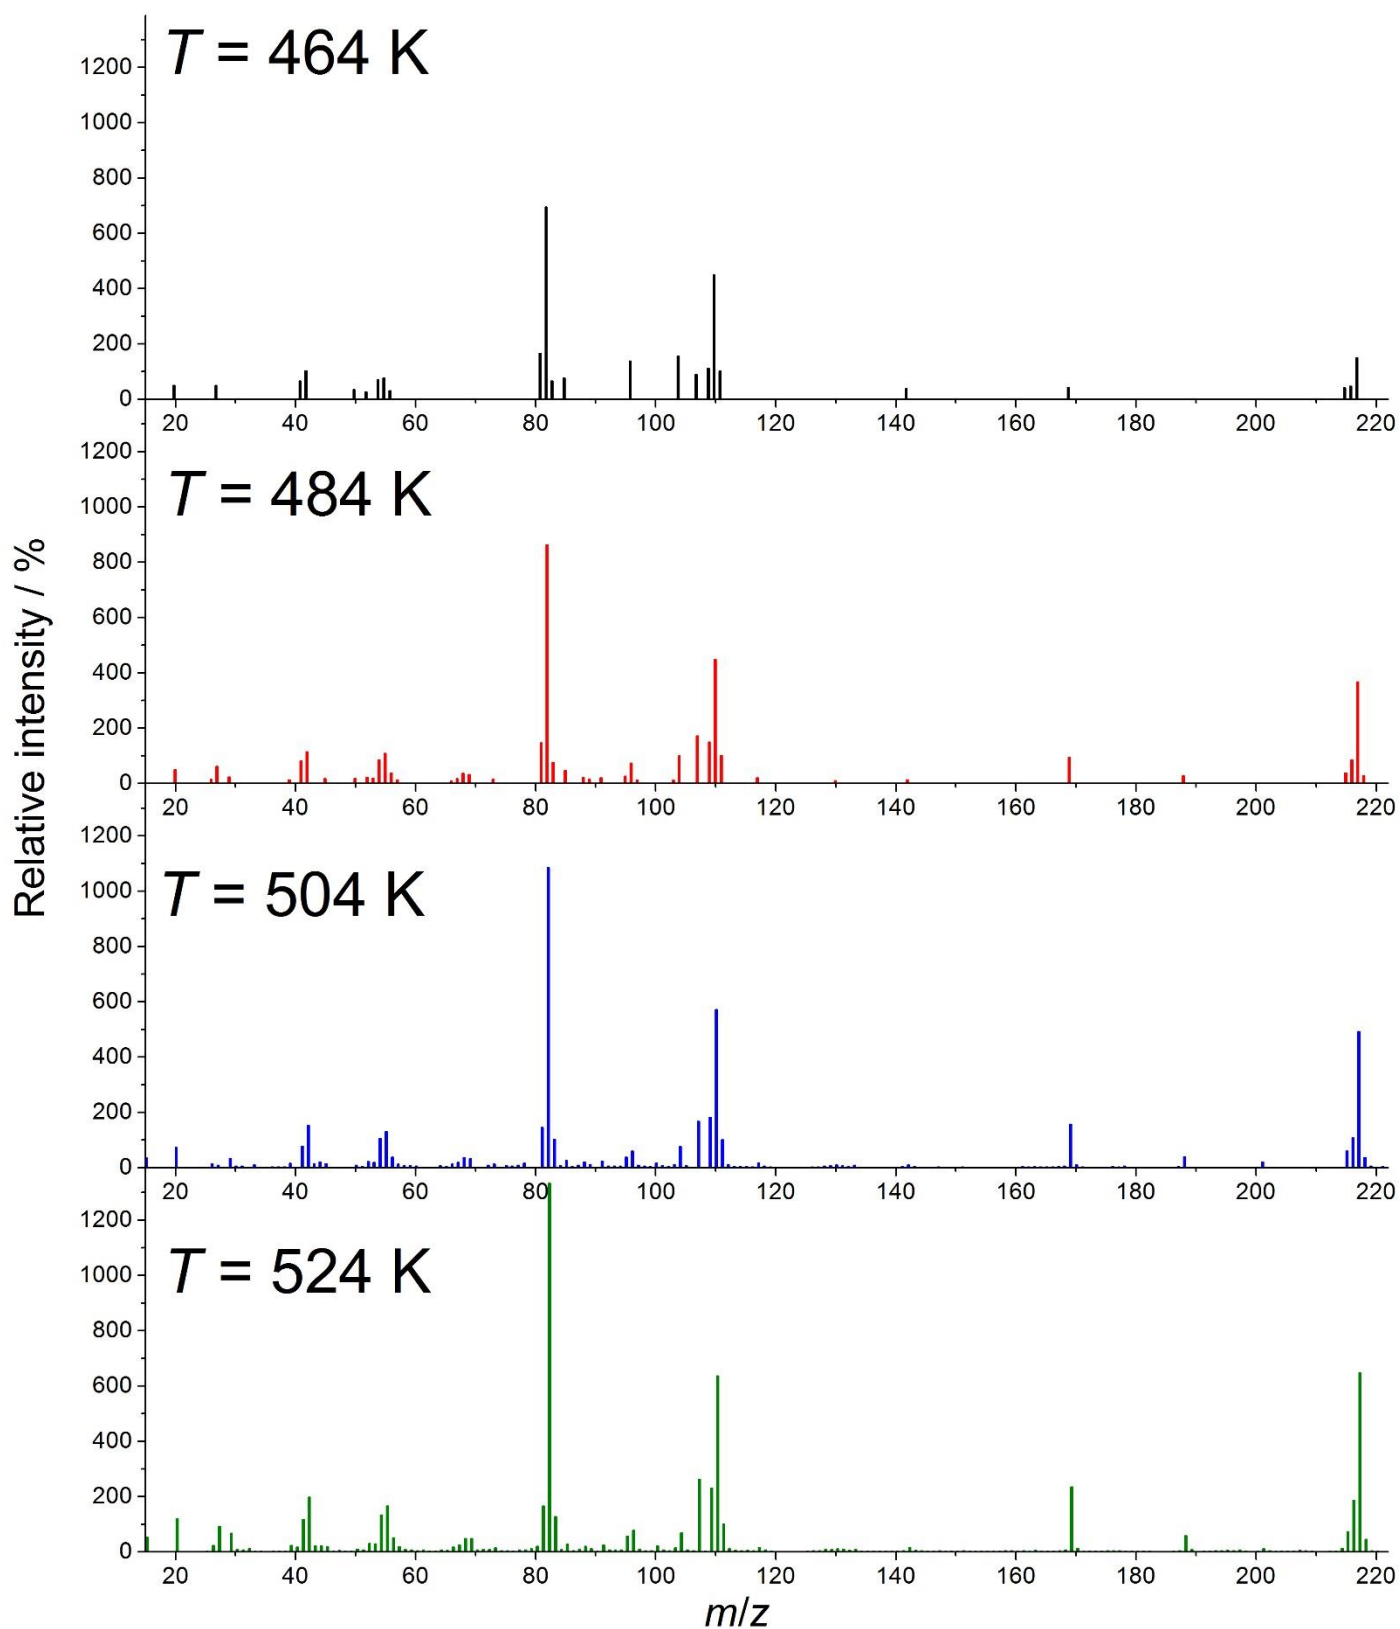

Figure S2. Full-scale background subtracted electron ionization mass spectra of EMImPF<sub>6</sub> under EC-II conditions relative to the intensity of the parent cation ( $m/z = 111$ )

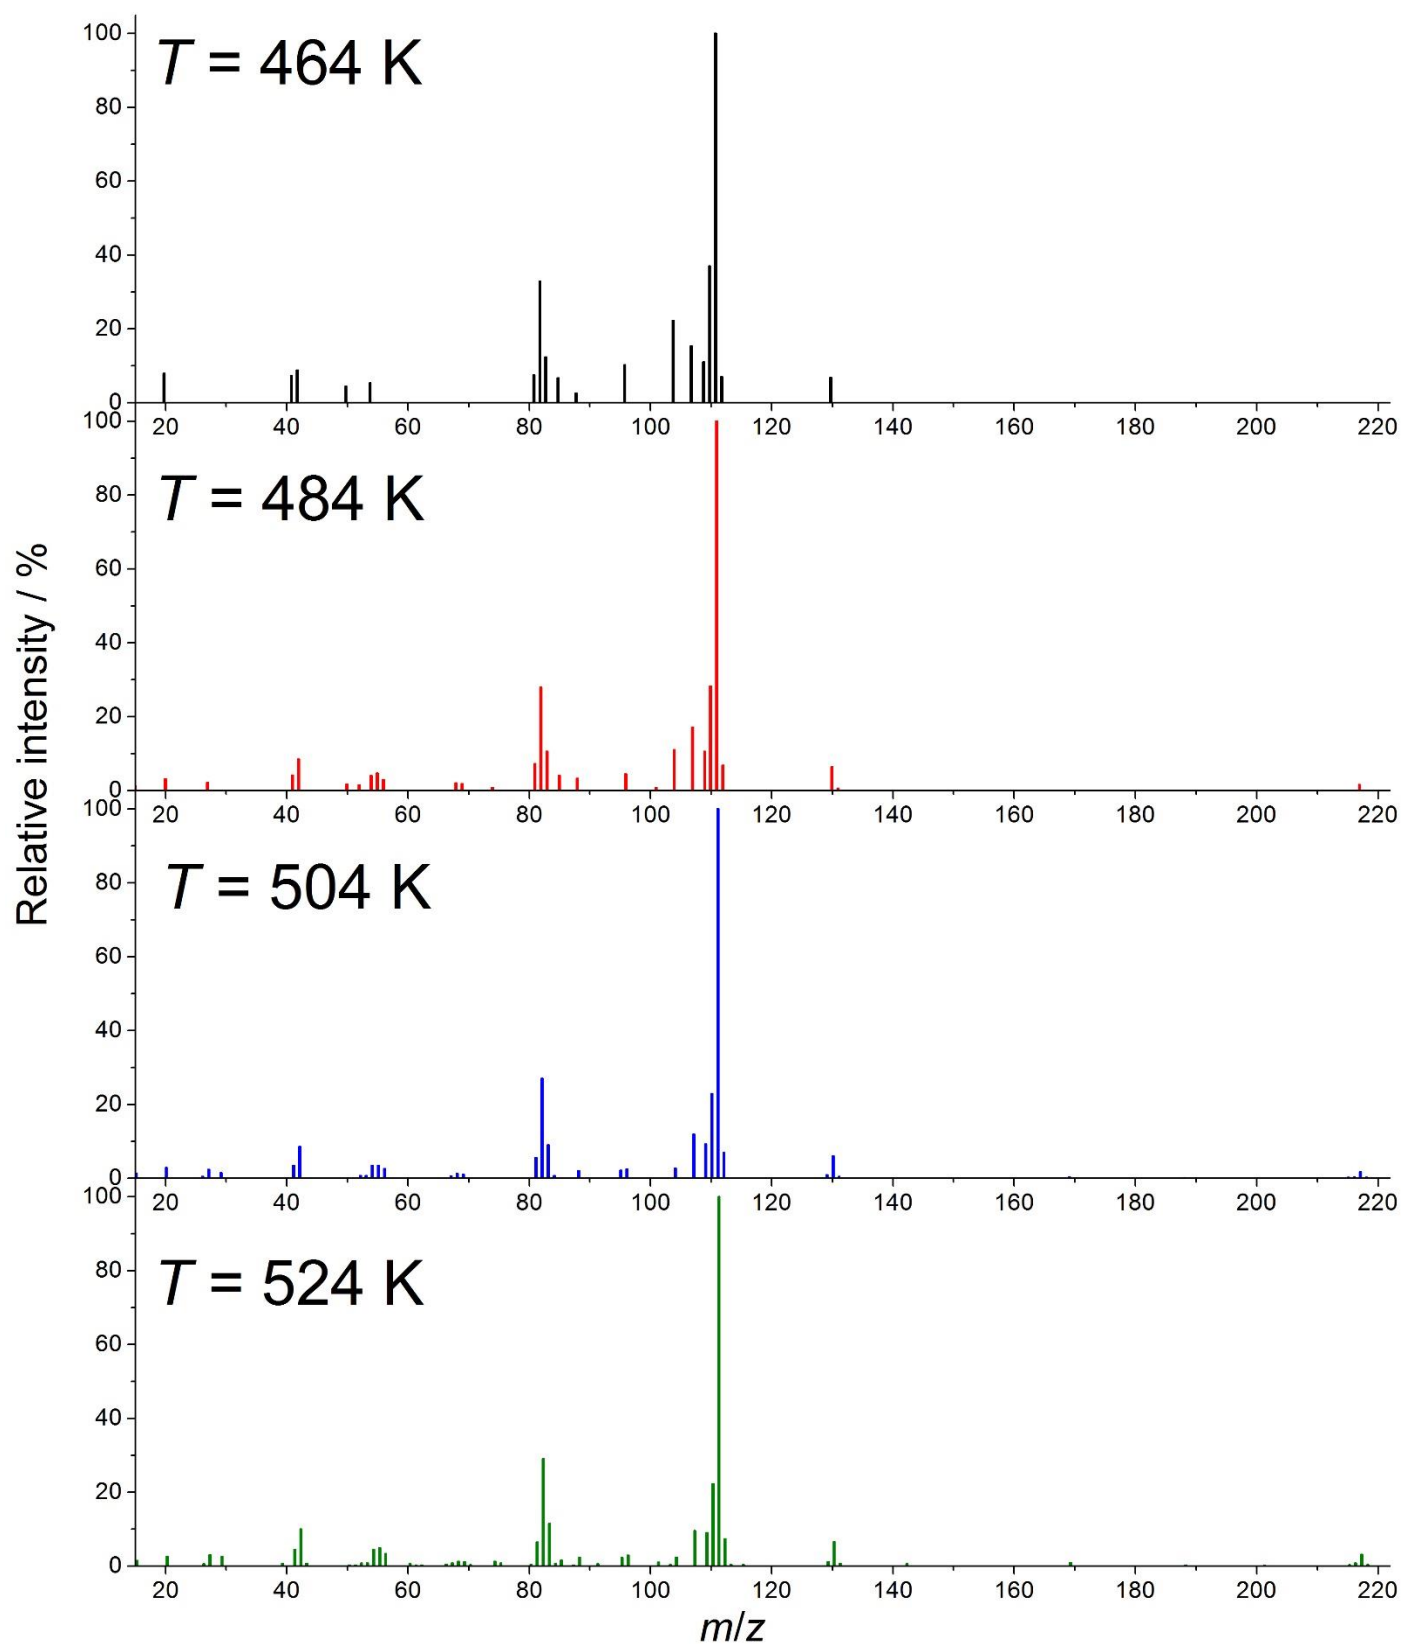

Figure S3. Full-scale background subtracted electron ionization mass spectra of EMImPF<sub>6</sub> under OC conditions relative to the intensity of the parent cation ( $m/z = 111$ )

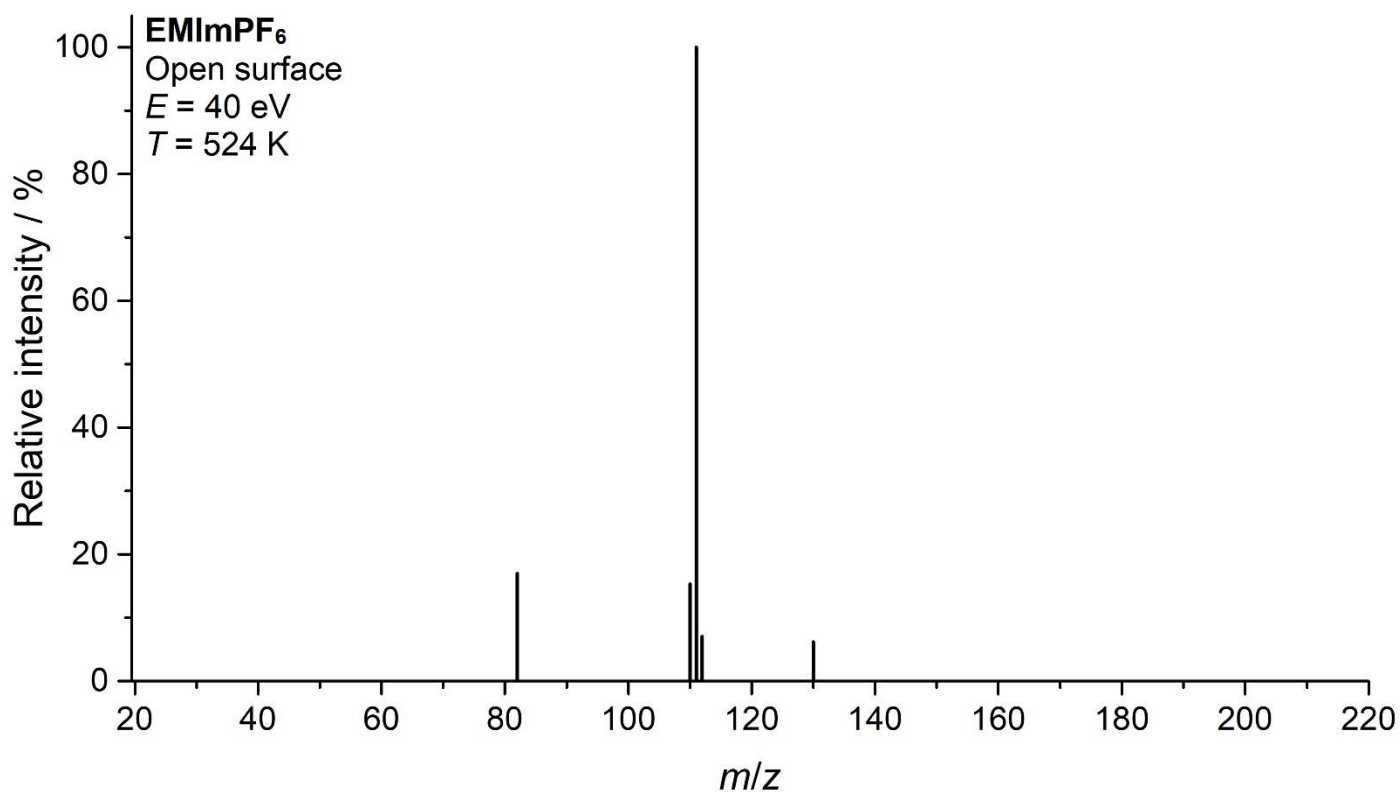

Figure S4. Full-scale background subtracted electron ionization mass spectra of EMImPF<sub>6</sub> under OS conditions relative to the intensity of the parent cation ( $m/z = 111$ )

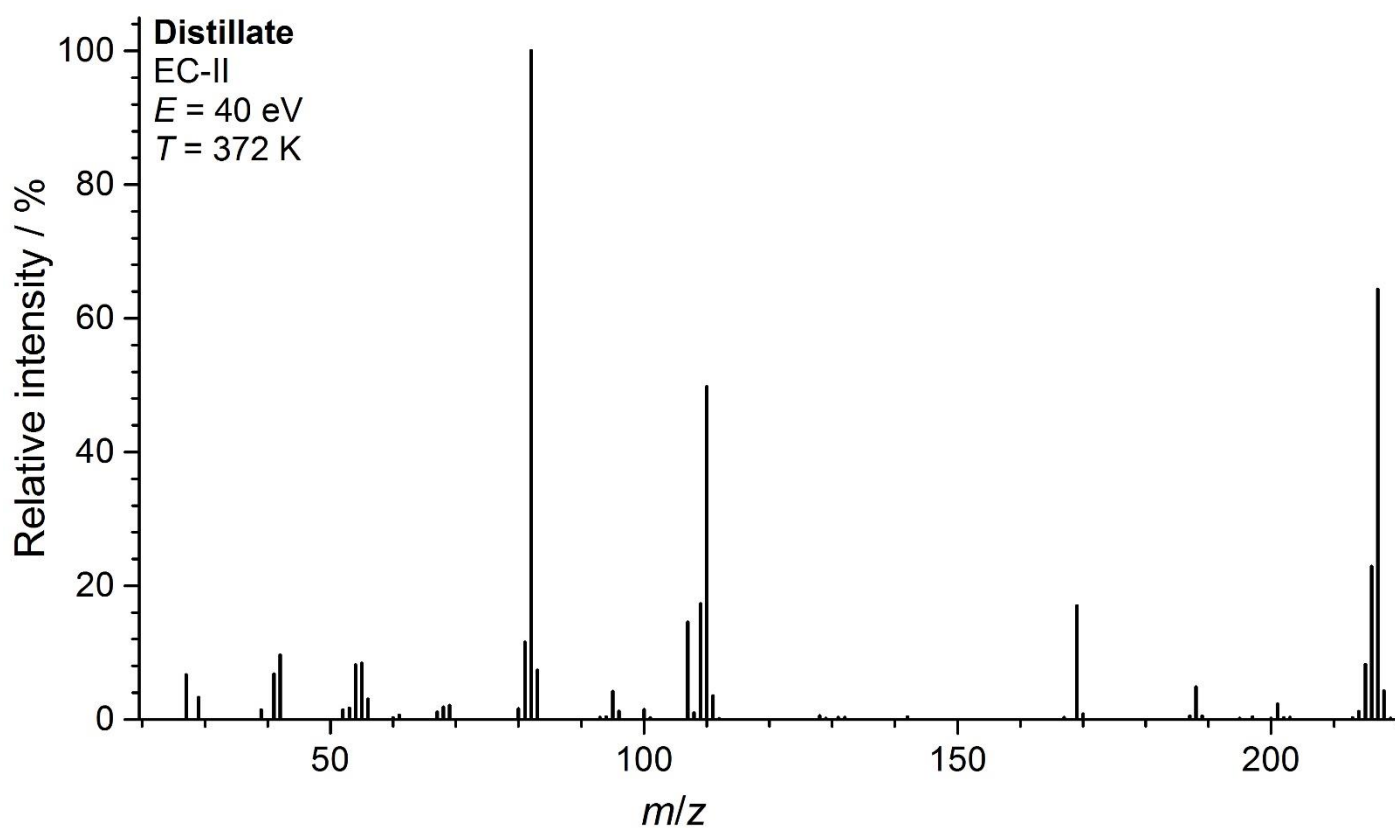

Figure S5. Full-scale background subtracted electron ionization mass spectra of IL distillate under EC-II conditions relative to the intensity of an ion with  $m/z = 82$

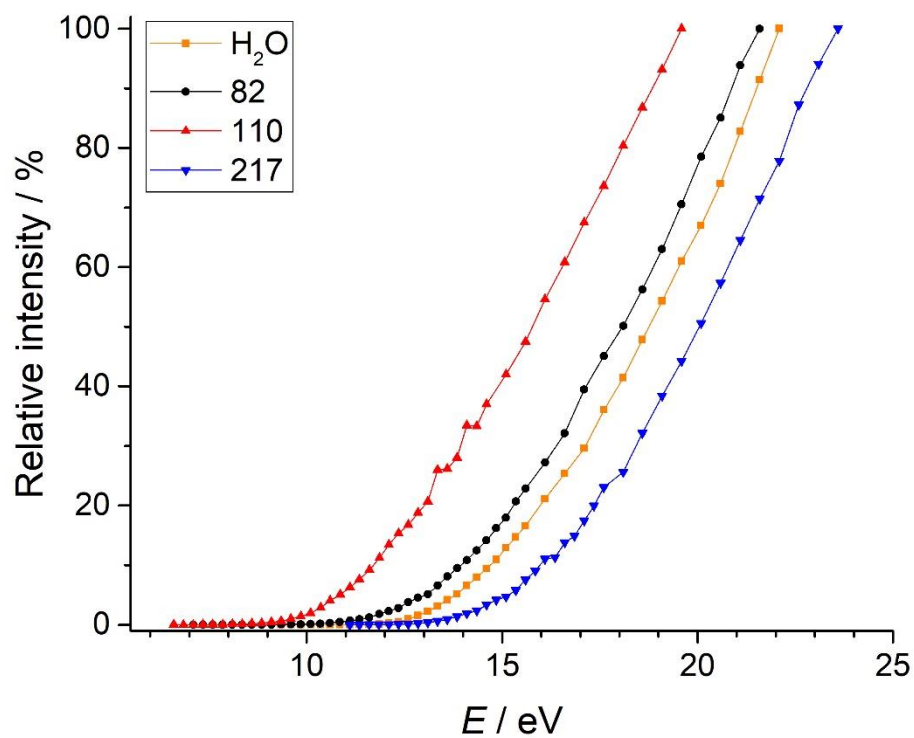

Figure S6. Ionization efficiency curves of the ions of IL distillate (90% is  $\text{C}_6\text{N}_2\text{H}_{10}\text{PF}_5$ ) under EC-II conditions at 374 K

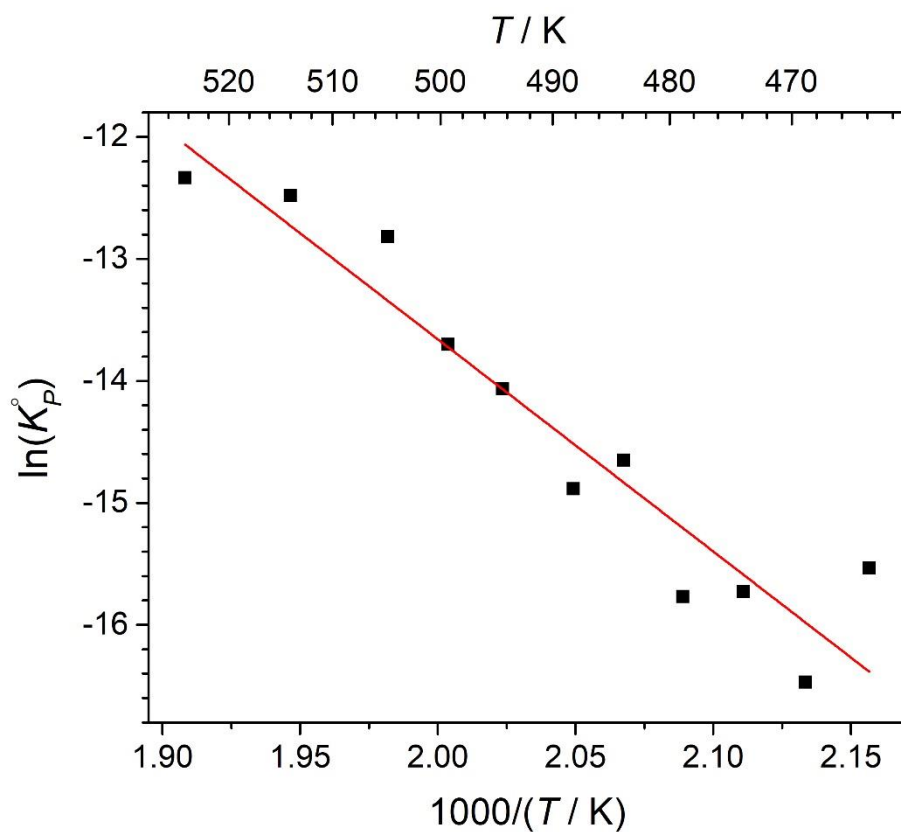

Figure S7. Temperature dependence of equilibrium constant of reaction I

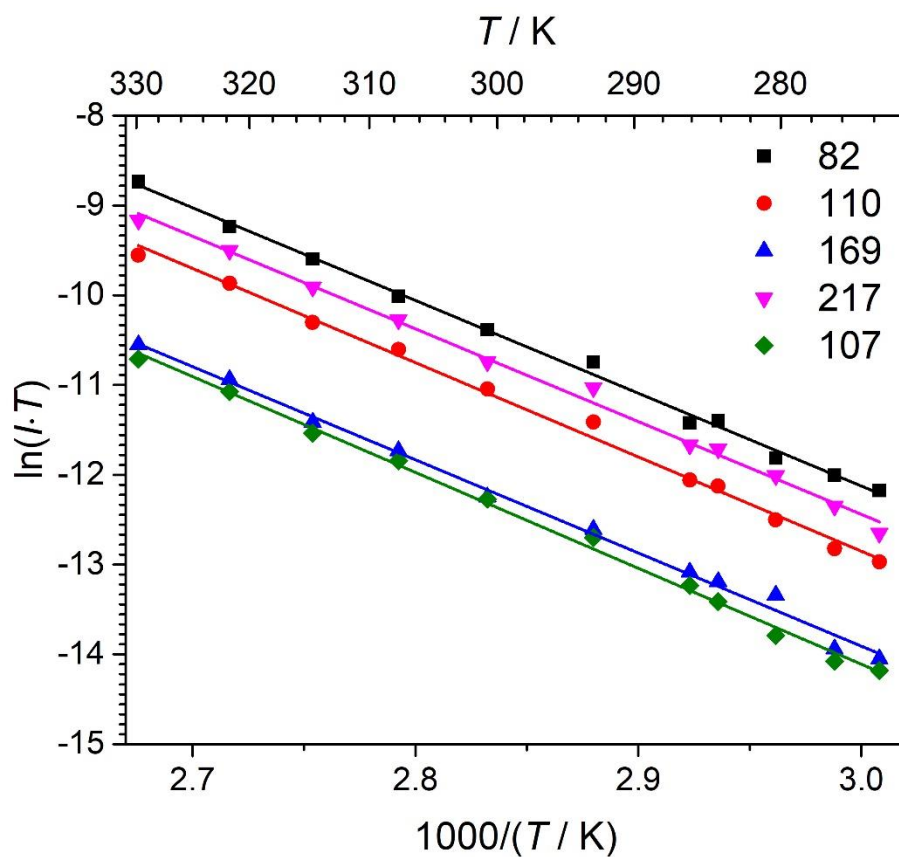

Figure S8. Temperature dependencies of ion currents over IL distillate (90% is  $C_6N_2H_{10}PF_5$ ) obtained under EC-II conditions

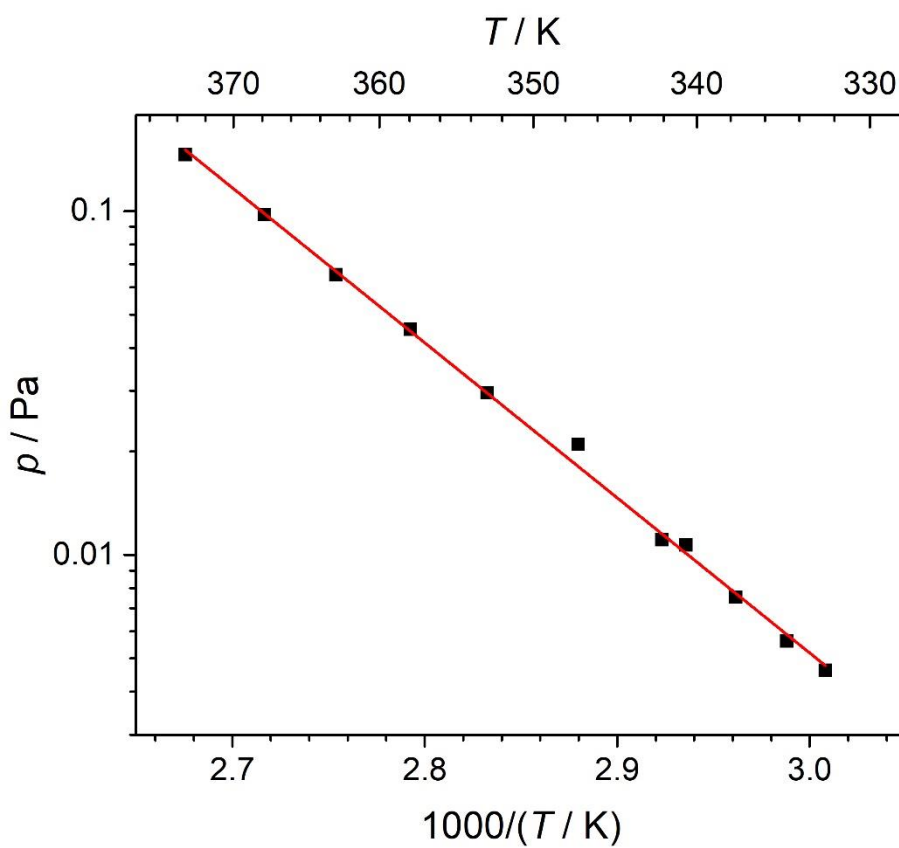

Figure S9. Temperature dependence of  $C_6N_2H_{10}PF_5$  vapor pressure over IL distillate (90% is  $C_6N_2H_{10}PF_5$ ) under EC-II conditions

Table S1. List of isogyric reactions used for determination of  $\Delta_f H^\circ(\text{EMImPF}_6, \text{g}, 298.15 \text{ K})$

| Reaction                                                                                                                  | $\Delta_r H^\circ / \text{kJ} \cdot \text{mol}^{-1}$ | $\Delta_f H^\circ / \text{kJ} \cdot \text{mol}^{-1}$ |
|---------------------------------------------------------------------------------------------------------------------------|------------------------------------------------------|------------------------------------------------------|
| $\text{EMImPF}_6 = \text{EMIm}^+ + \text{PF}_6^-$                                                                         | 343.6                                                | -1933.4                                              |
| $\text{EMImPF}_6 + \text{H}_2 + \text{H}^- = \text{Im} + \text{CH}_4 + \text{C}_2\text{H}_6 + \text{PF}_6^-$              | -494.7                                               | -1934.1                                              |
| $\text{EMImPF}_6 + \text{H}^- = \text{Im} + \text{CH}_3^\cdot + \text{C}_2\text{H}_5^\cdot + \text{PF}_6^-$               | -73.6                                                | -1943.2                                              |
| $\text{EMImPF}_6 + \text{HF} = \text{Im} + \text{CH}_3\text{F} + \text{C}_2\text{H}_5\text{F} + \text{PF}_5$              | 241.7                                                | -1938.8                                              |
| $\text{EMImPF}_6 + \text{H}_2 = \text{Im} + \text{CH}_4 + \text{C}_2\text{H}_5\text{F} + \text{PF}_5$                     | 131.6                                                | -1929.6                                              |
| $\text{EMImPF}_6 + \text{H}_2 = \text{Im} + \text{CH}_3\text{F} + \text{C}_2\text{H}_5\text{F} + \text{PF}_3 + \text{HF}$ | 329.1                                                | -1937.9                                              |
| $\text{EMImPF}_6 + \text{H}_2 + \text{H}^- = \text{Pyr} + \text{CH}_4 + \text{C}_2\text{H}_6 + \text{PF}_6^-$             | -448.7                                               | 1935.5                                               |
| $\text{EMImPF}_6 + \text{H}^- = \text{MIm} + \text{C}_2\text{H}_6 + \text{PF}_6^-$                                        | -465.2                                               | -1932.0                                              |
| $\text{EMImPF}_6 + \text{H} = \text{MIm} + \text{C}_2\text{H}_6 + \text{PF}_5 + \text{F}$                                 | 210.2                                                | -1936.3                                              |
| $\text{EMImPF}_6 + \text{H} = \text{MIm} + \text{C}_2\text{H}_5^\cdot + \text{HF} + \text{PF}_5$                          | 60.8                                                 | -1948.6                                              |
| $\text{EMImPF}_6 = \text{MIm} + \text{C}_2\text{H}_4 + \text{HF} + \text{PF}_5$                                           | 211.0                                                | -1935.4                                              |
| $\text{EMImPF}_6 = \text{MIm} + \text{C}_2\text{H}_5\text{F} + \text{PF}_5$                                               | 161.0                                                | -1927.5                                              |
| $\text{EMImPF}_6 + \text{H}^- = \text{EIm} + \text{CH}_4 + \text{PF}_6^-$                                                 | -475.4                                               | -1933.9                                              |
| $\text{EMImPF}_6 + \text{H} = \text{EIm} + \text{CH}_4 + \text{PF}_5 + \text{F}$                                          | 200.1                                                | -1938.3                                              |
| $\text{EMImPF}_6 + \text{H} = \text{EIm} + \text{CH}_3^\cdot + \text{HF} + \text{PF}_5$                                   | 66.6                                                 | -1936.6                                              |
| $\text{EMImPF}_6 = \text{EIm} + \text{CH}_3\text{F} + \text{PF}_5$                                                        | 176.8                                                | -1948.8                                              |
| $\text{EMImPF}_6 = \text{EMIm} + \text{HF} + \text{PF}_5$                                                                 | 100.7                                                | -1941.5                                              |
| <b>AVERAGE:</b>                                                                                                           |                                                      | -1937 $\pm$ 3                                        |

Table S2. Calculated partial vapor pressures under EC conditions and sublimation enthalpies obtained in the framework of the third law method

| $T / \text{K}$ | $p / \times 10^4 \text{ Pa}$ | $\Delta_s H^\circ(\text{NIP}, 298.15 \text{ K})$ |
|----------------|------------------------------|--------------------------------------------------|
| 524            | 16.0                         | 152.5                                            |
| 514            | 10.3                         | 152.0                                            |
| 505            | 6.60                         | 151.7                                            |
| 494            | 3.51                         | 151.8                                            |
| 484            | 1.73                         | 152.1                                            |
| 474            | 0.93                         | 152.1                                            |
| 464            | 0.37                         | 153.0                                            |
| 469            | 0.63                         | 152.3                                            |
| 479            | 1.30                         | 152.0                                            |
| 488            | 2.51                         | 151.7                                            |
| 499            | 4.44                         | 152.1                                            |
| 478            | 4.54                         | 134.91                                           |
| 463            | 1.55                         | 135.33                                           |
